# Supplementary material for: The association between mosaic loss of Y chromosome and mortality in patients with ST-segment elevation myocardial infarction: A prospective cohort study
Source: Research Square preprint supplement (doi:10.21203/rs.3.rs-7117876/v1), 2025-07-31
Supplement: Supplementary file 1 [file 31677c5ec21691527f64b482.docx]

**Supplement 1**

**Item Page**

Figure S1··············1

Figure S2··············2

Figure S3··············3

Figure S4··············4

Figure S5··············5

Figure S6··············6

Figure S7··············7

Table S1···············8

Table S2··············9-11

Table S3·············12-13

**Figure S1.**


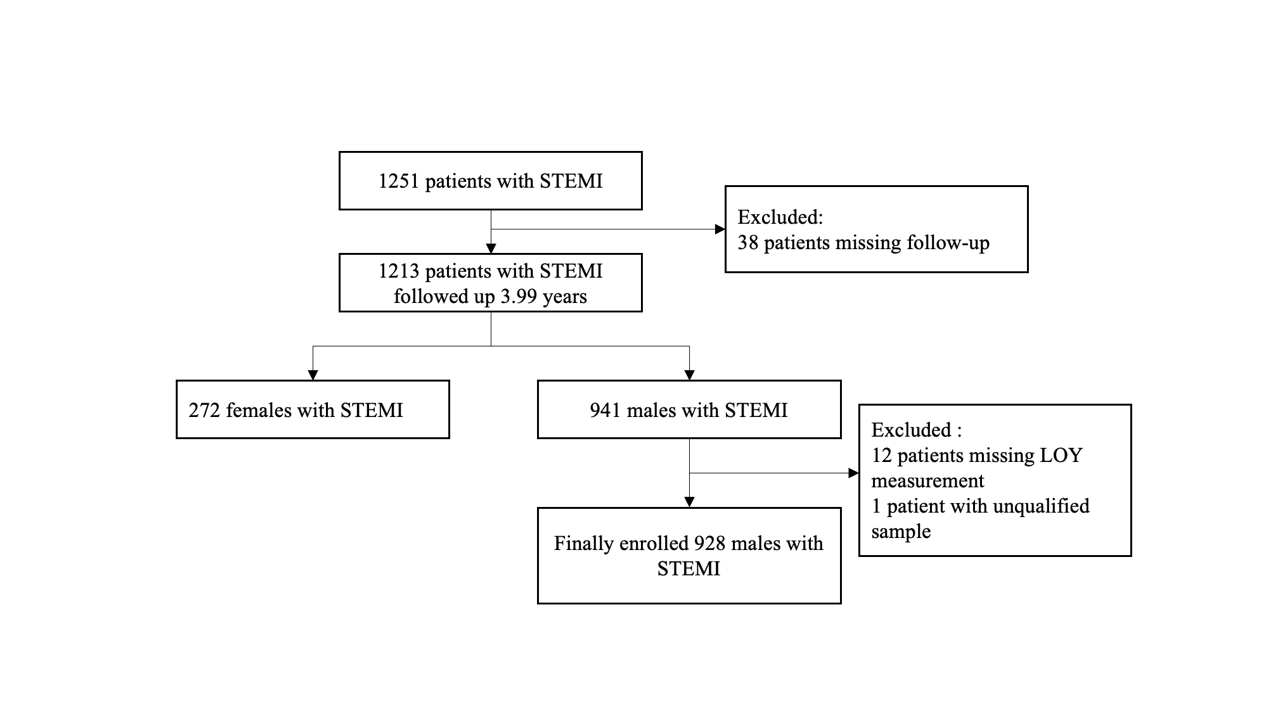


**Figure S1. The flowchart of this study.** LOY, loss of Y chromosome; STEMI: ST-segment elevation myocardial infarction.

**Figure S2.**

**
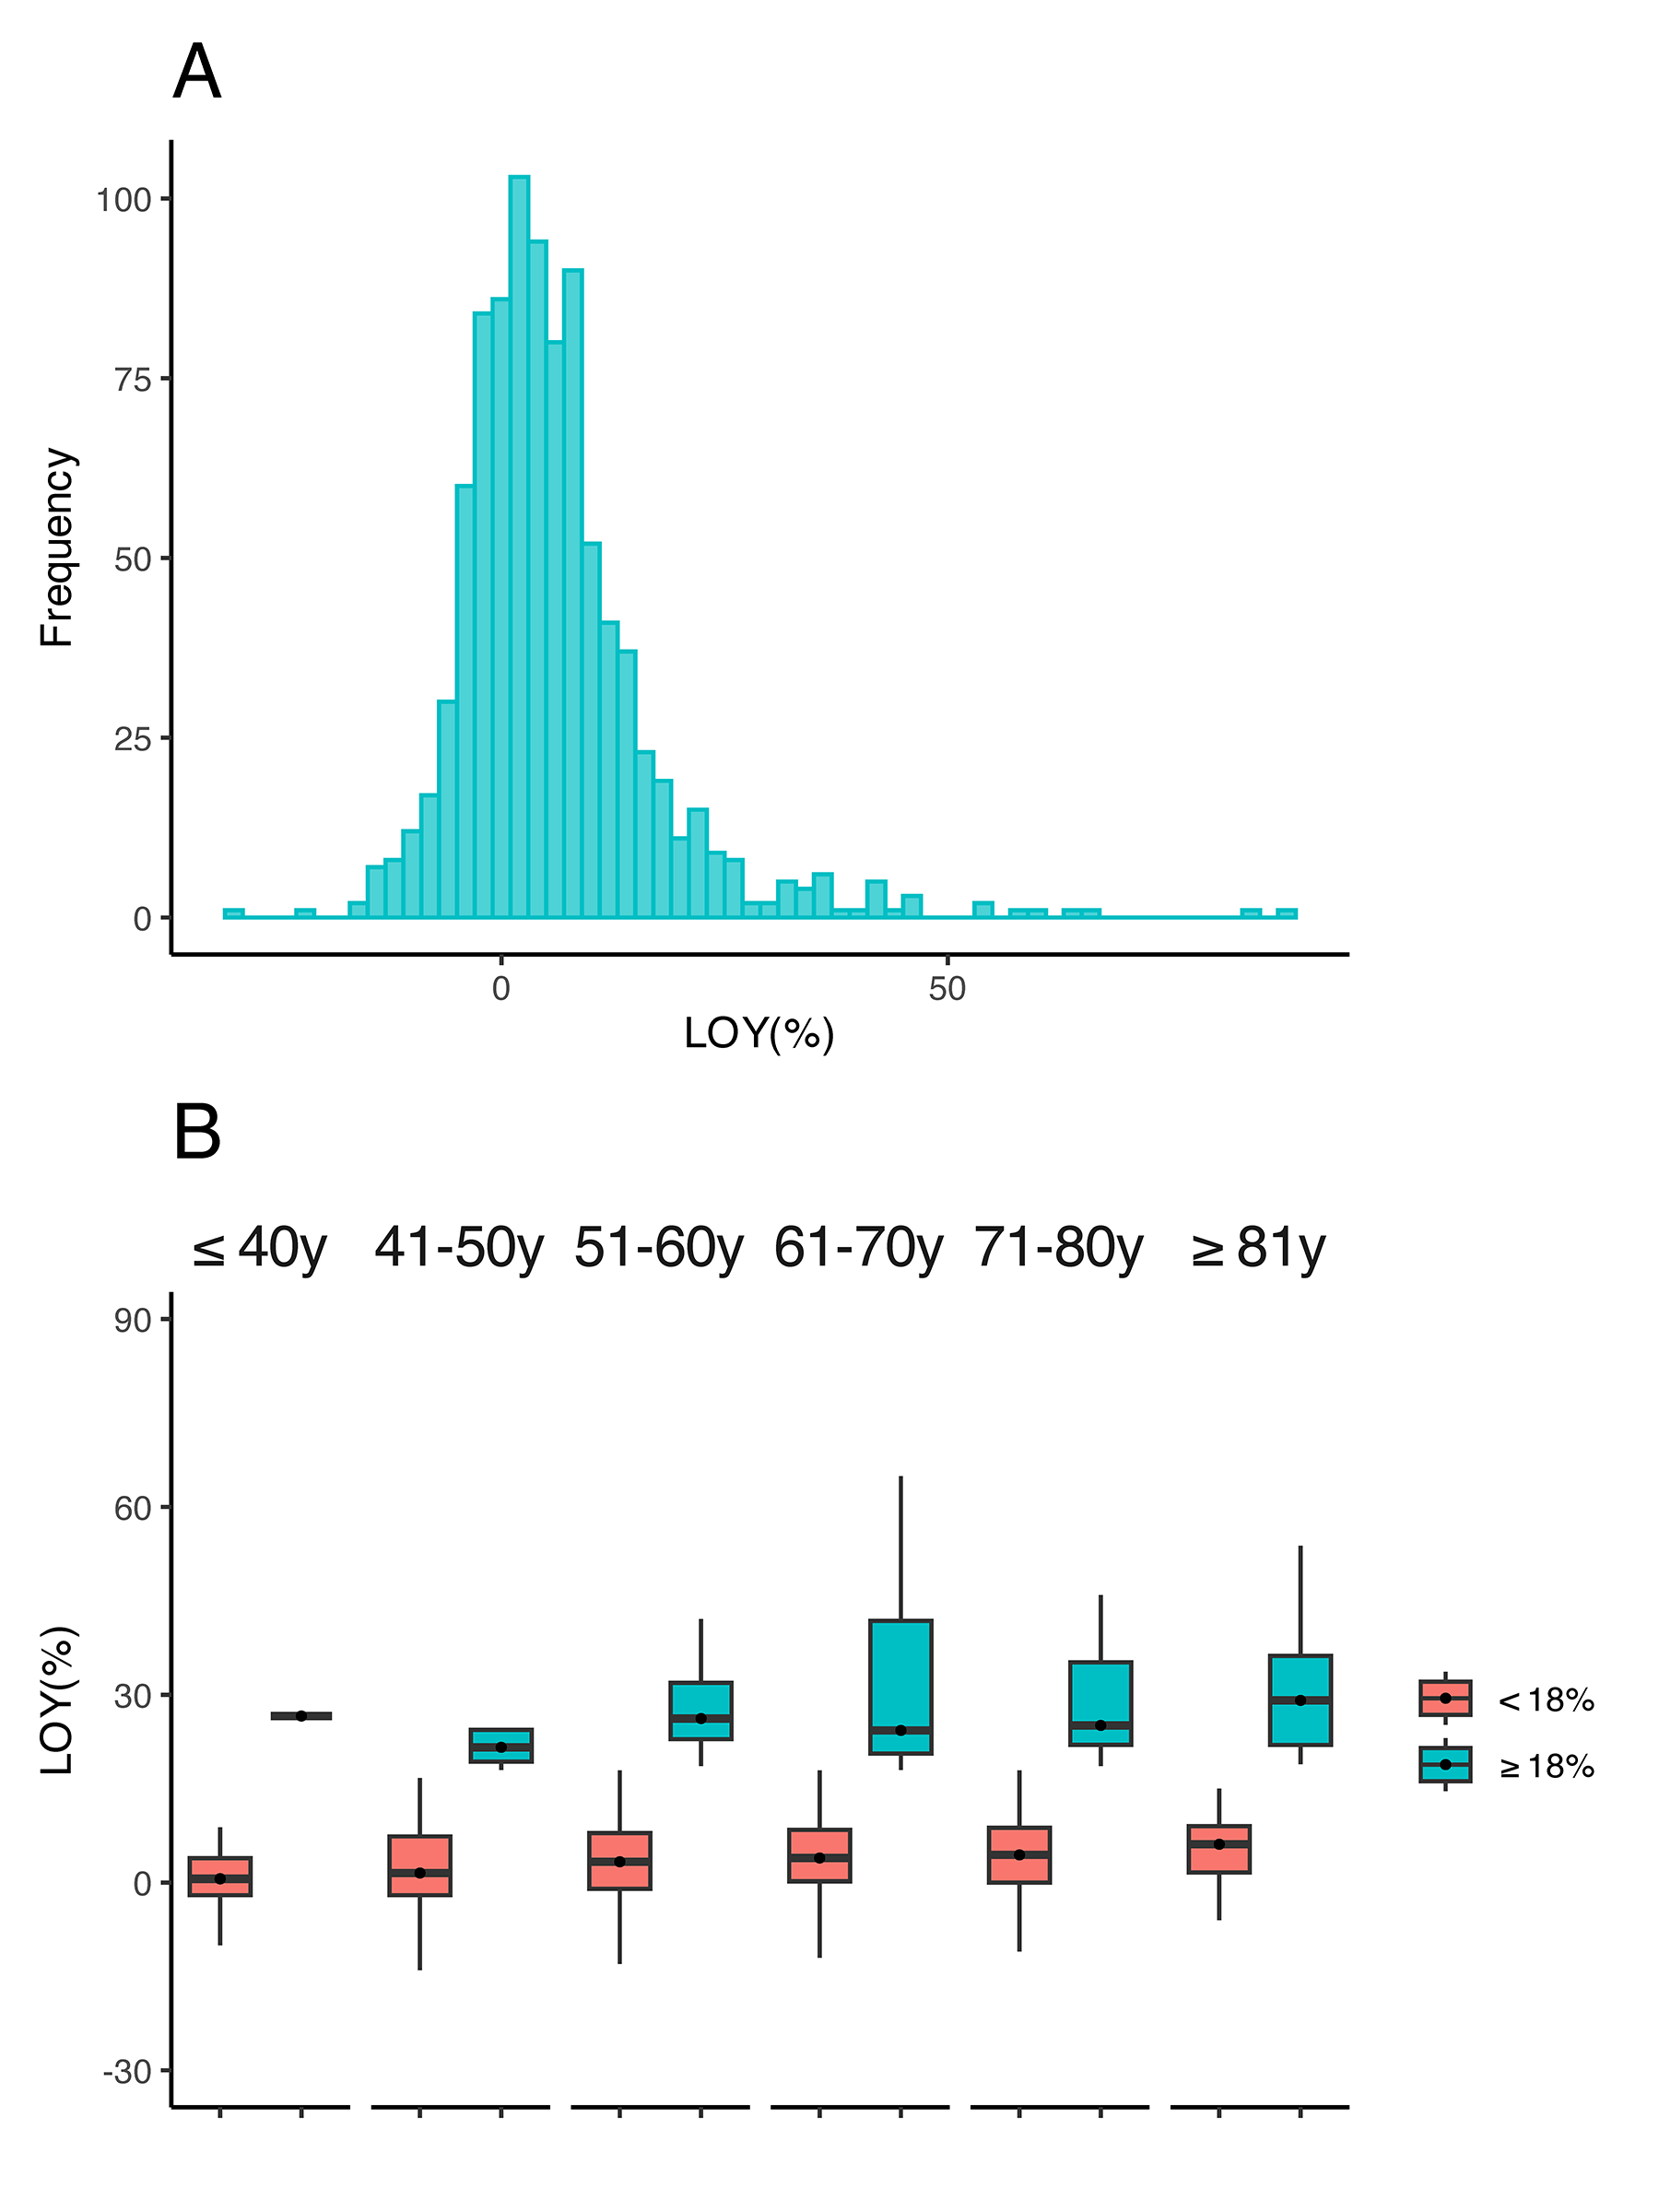
**

**Figure S2. The distributions of loss of Y chromosome ratio (A) and the boxplot for loss of Y chromosome ratio in age subgroups (B).**

**Figure S3.**

**
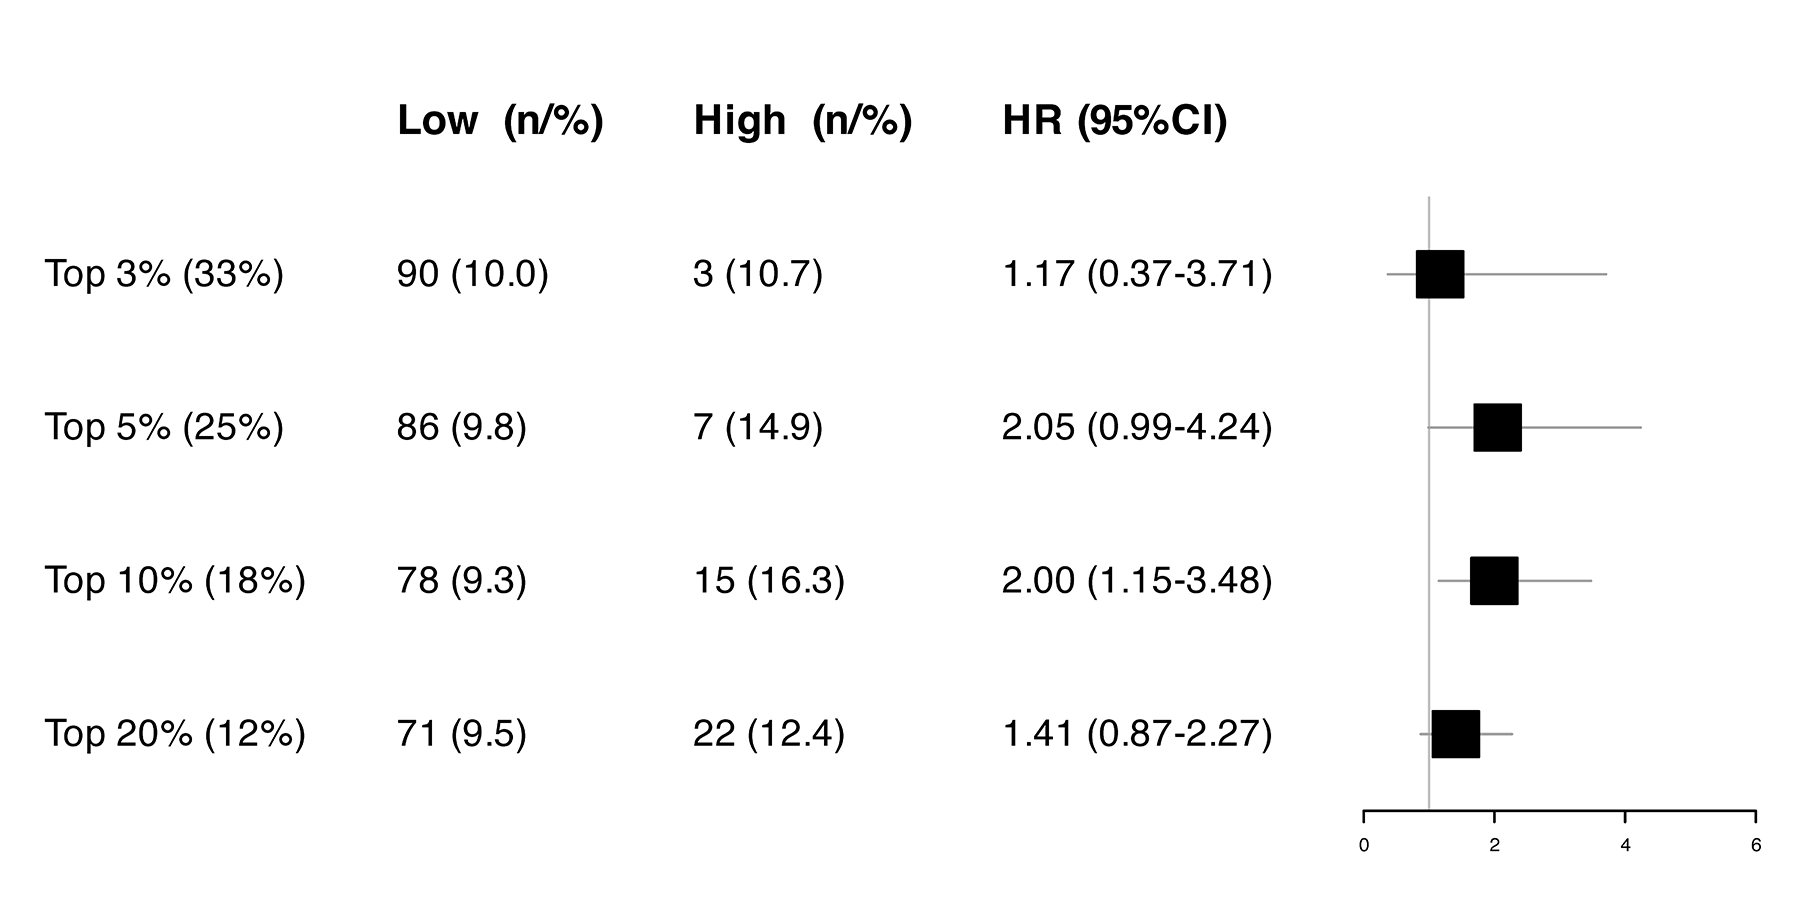
**

**Figure S3. Univariate Cox regression analysis of dichotomized loss of Y chromosome ratio and all-cause mortality.** CI: confidence interval; HR: Risk ratio.

**Figure S4.**

**
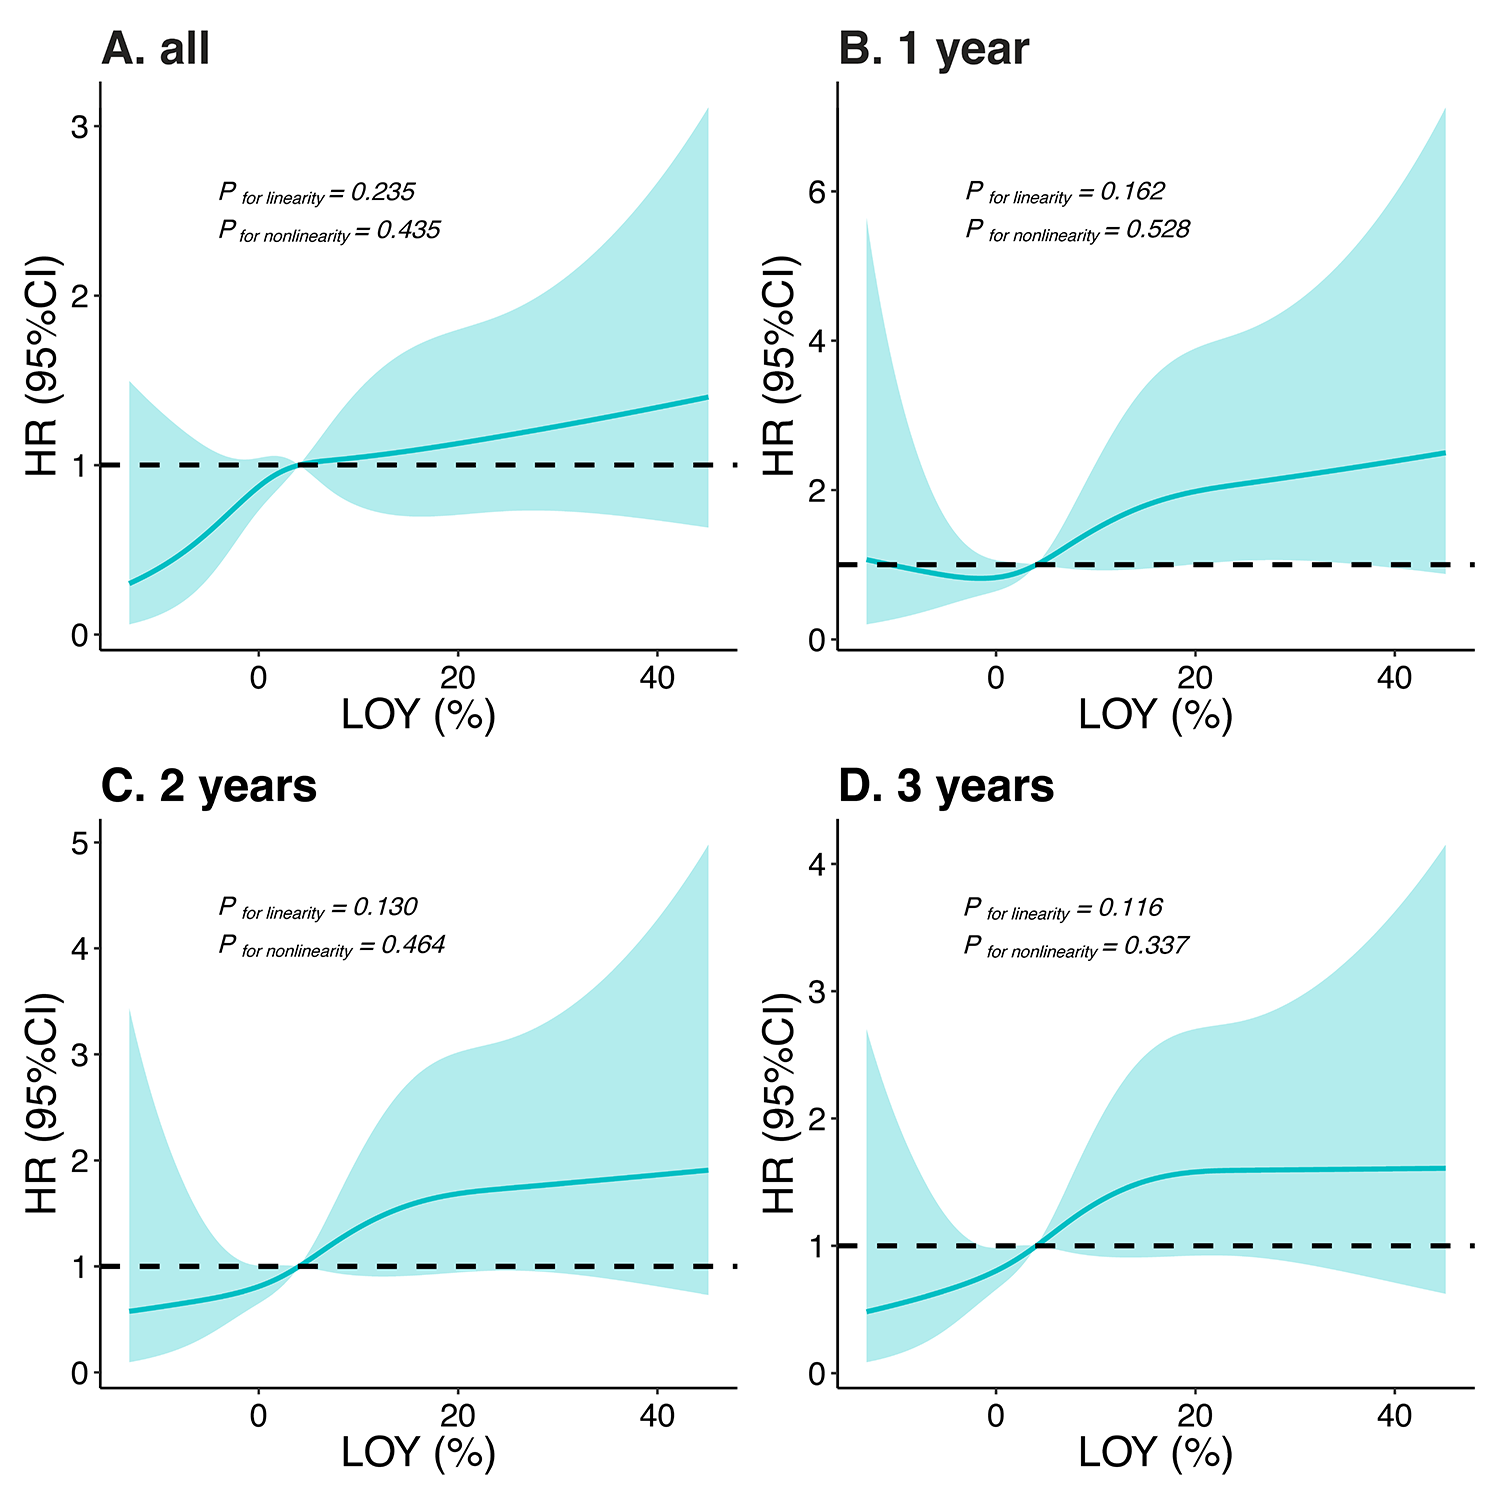
**

**Figure S4. Continuous hazard ratio across LOY for all-cause mortality at 1, 2, and 3 years, and over the entire follow-up period.**CI: confidence interval; HR, hazard ratio; LOY, loss of chromosome. The blue line indicates unadjusted fits with the 95% confidence intervals shown as the blue-shaded area.

**Figure S5.**

**
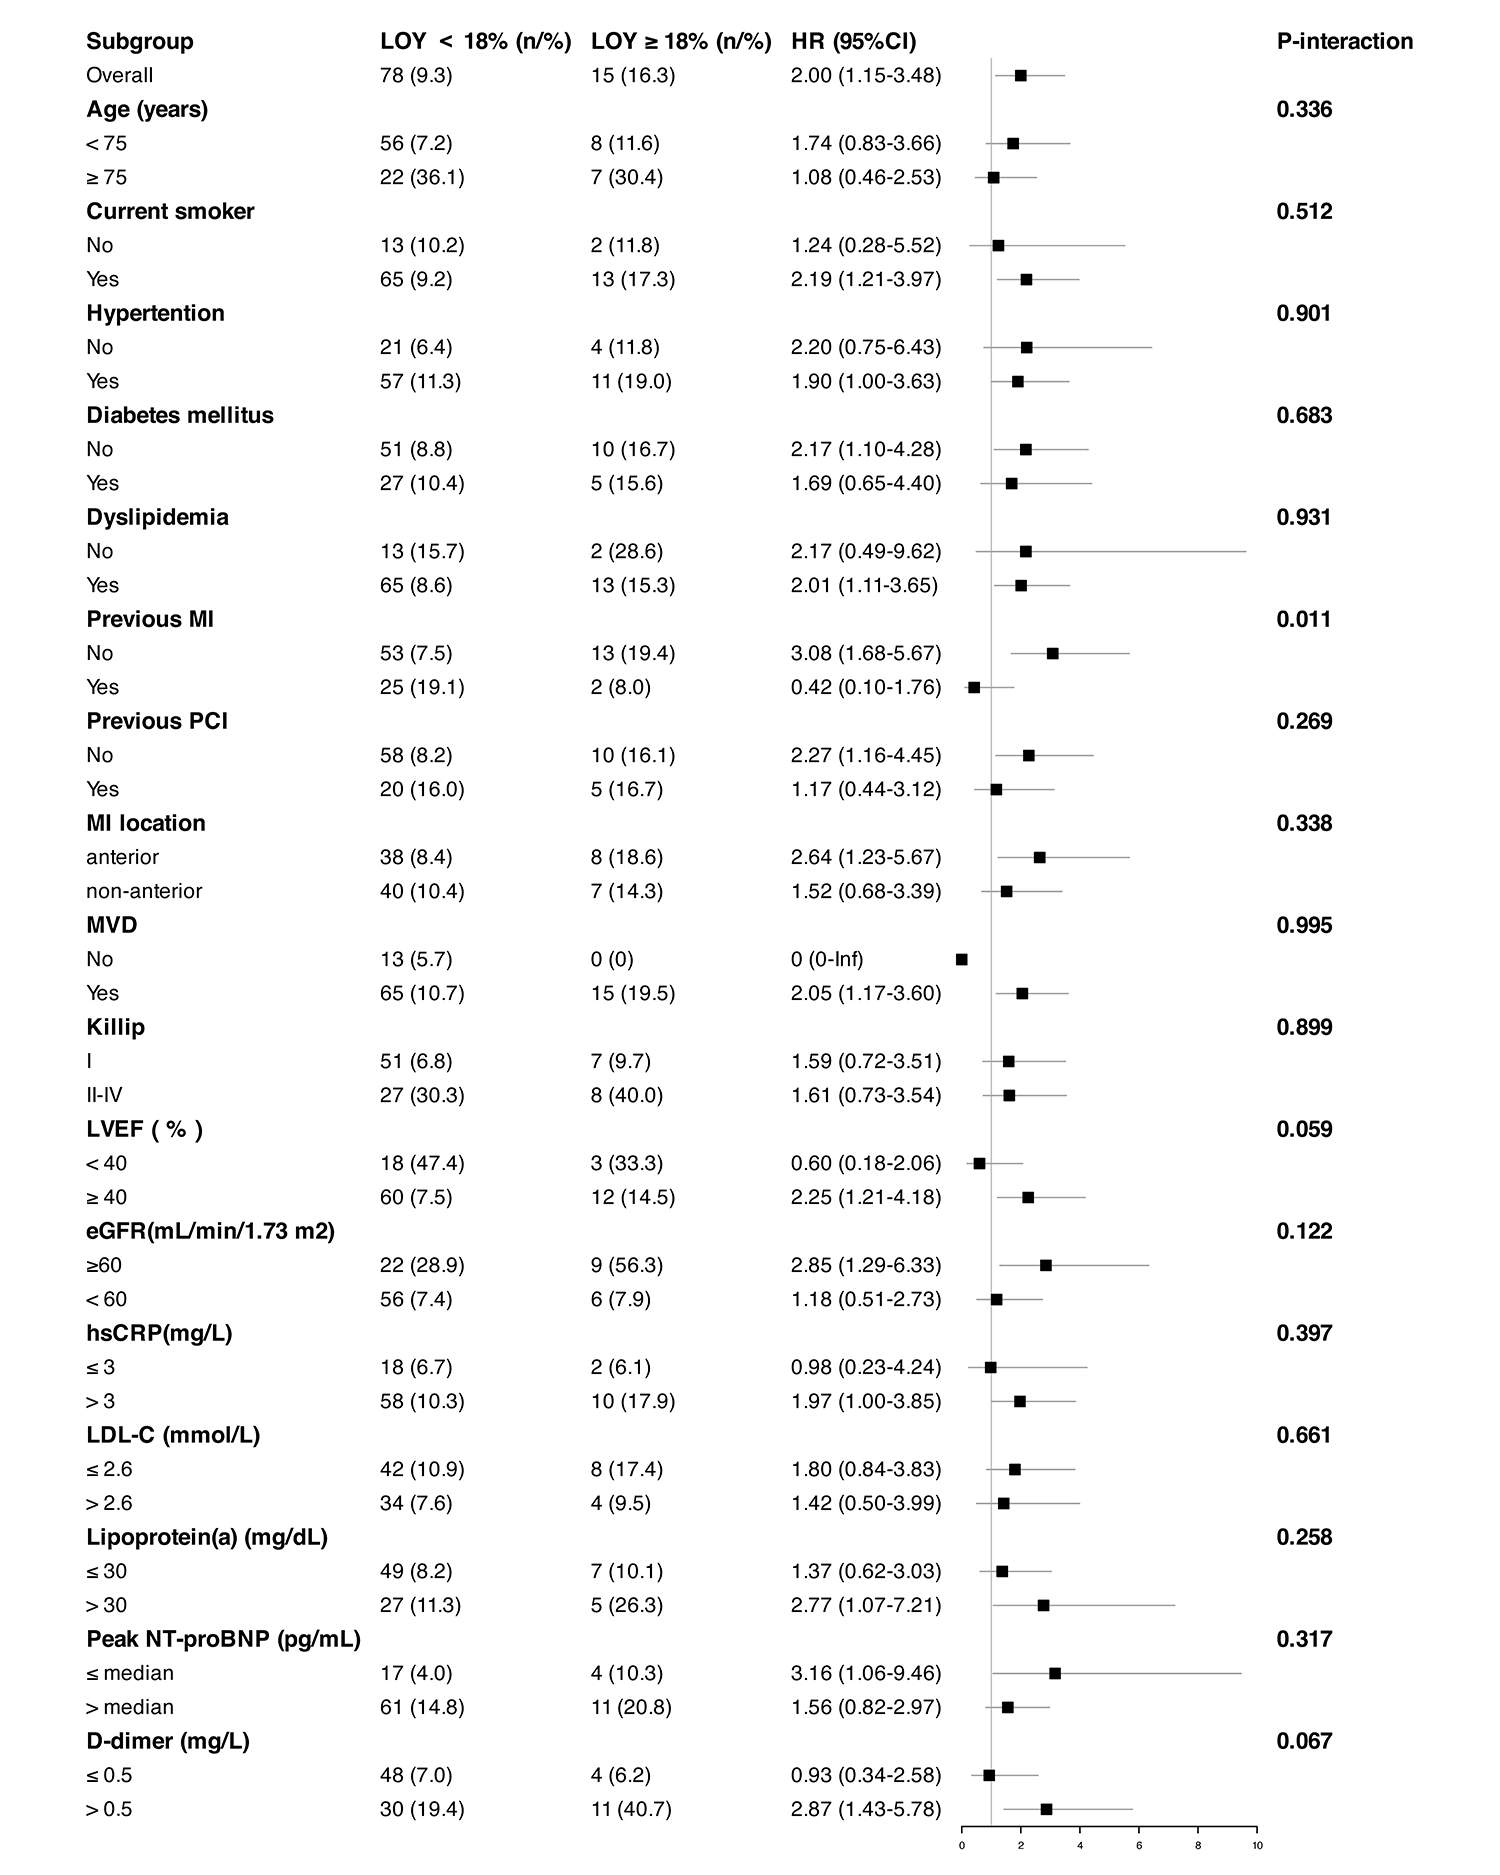
**

**Figure S5. Subgroup analysis for association between all-cause mortality and dichotomized loss of Y chromosome ratio.** eGFR, estimated glomerular filtration rate; HR, hazard ratio; hsCRP, high-sensitivity C-reactive protein; LDL-C, low-density lipoprotein cholesterol; LVEF, left ventricular ejection fraction; MI, myocardial infarction; MVD, multiple vessels disease; NT-proBNP, N-terminal pro B-type natriuretic peptide; PCI, percutaneous coronary intervention.

**Figure S6.**


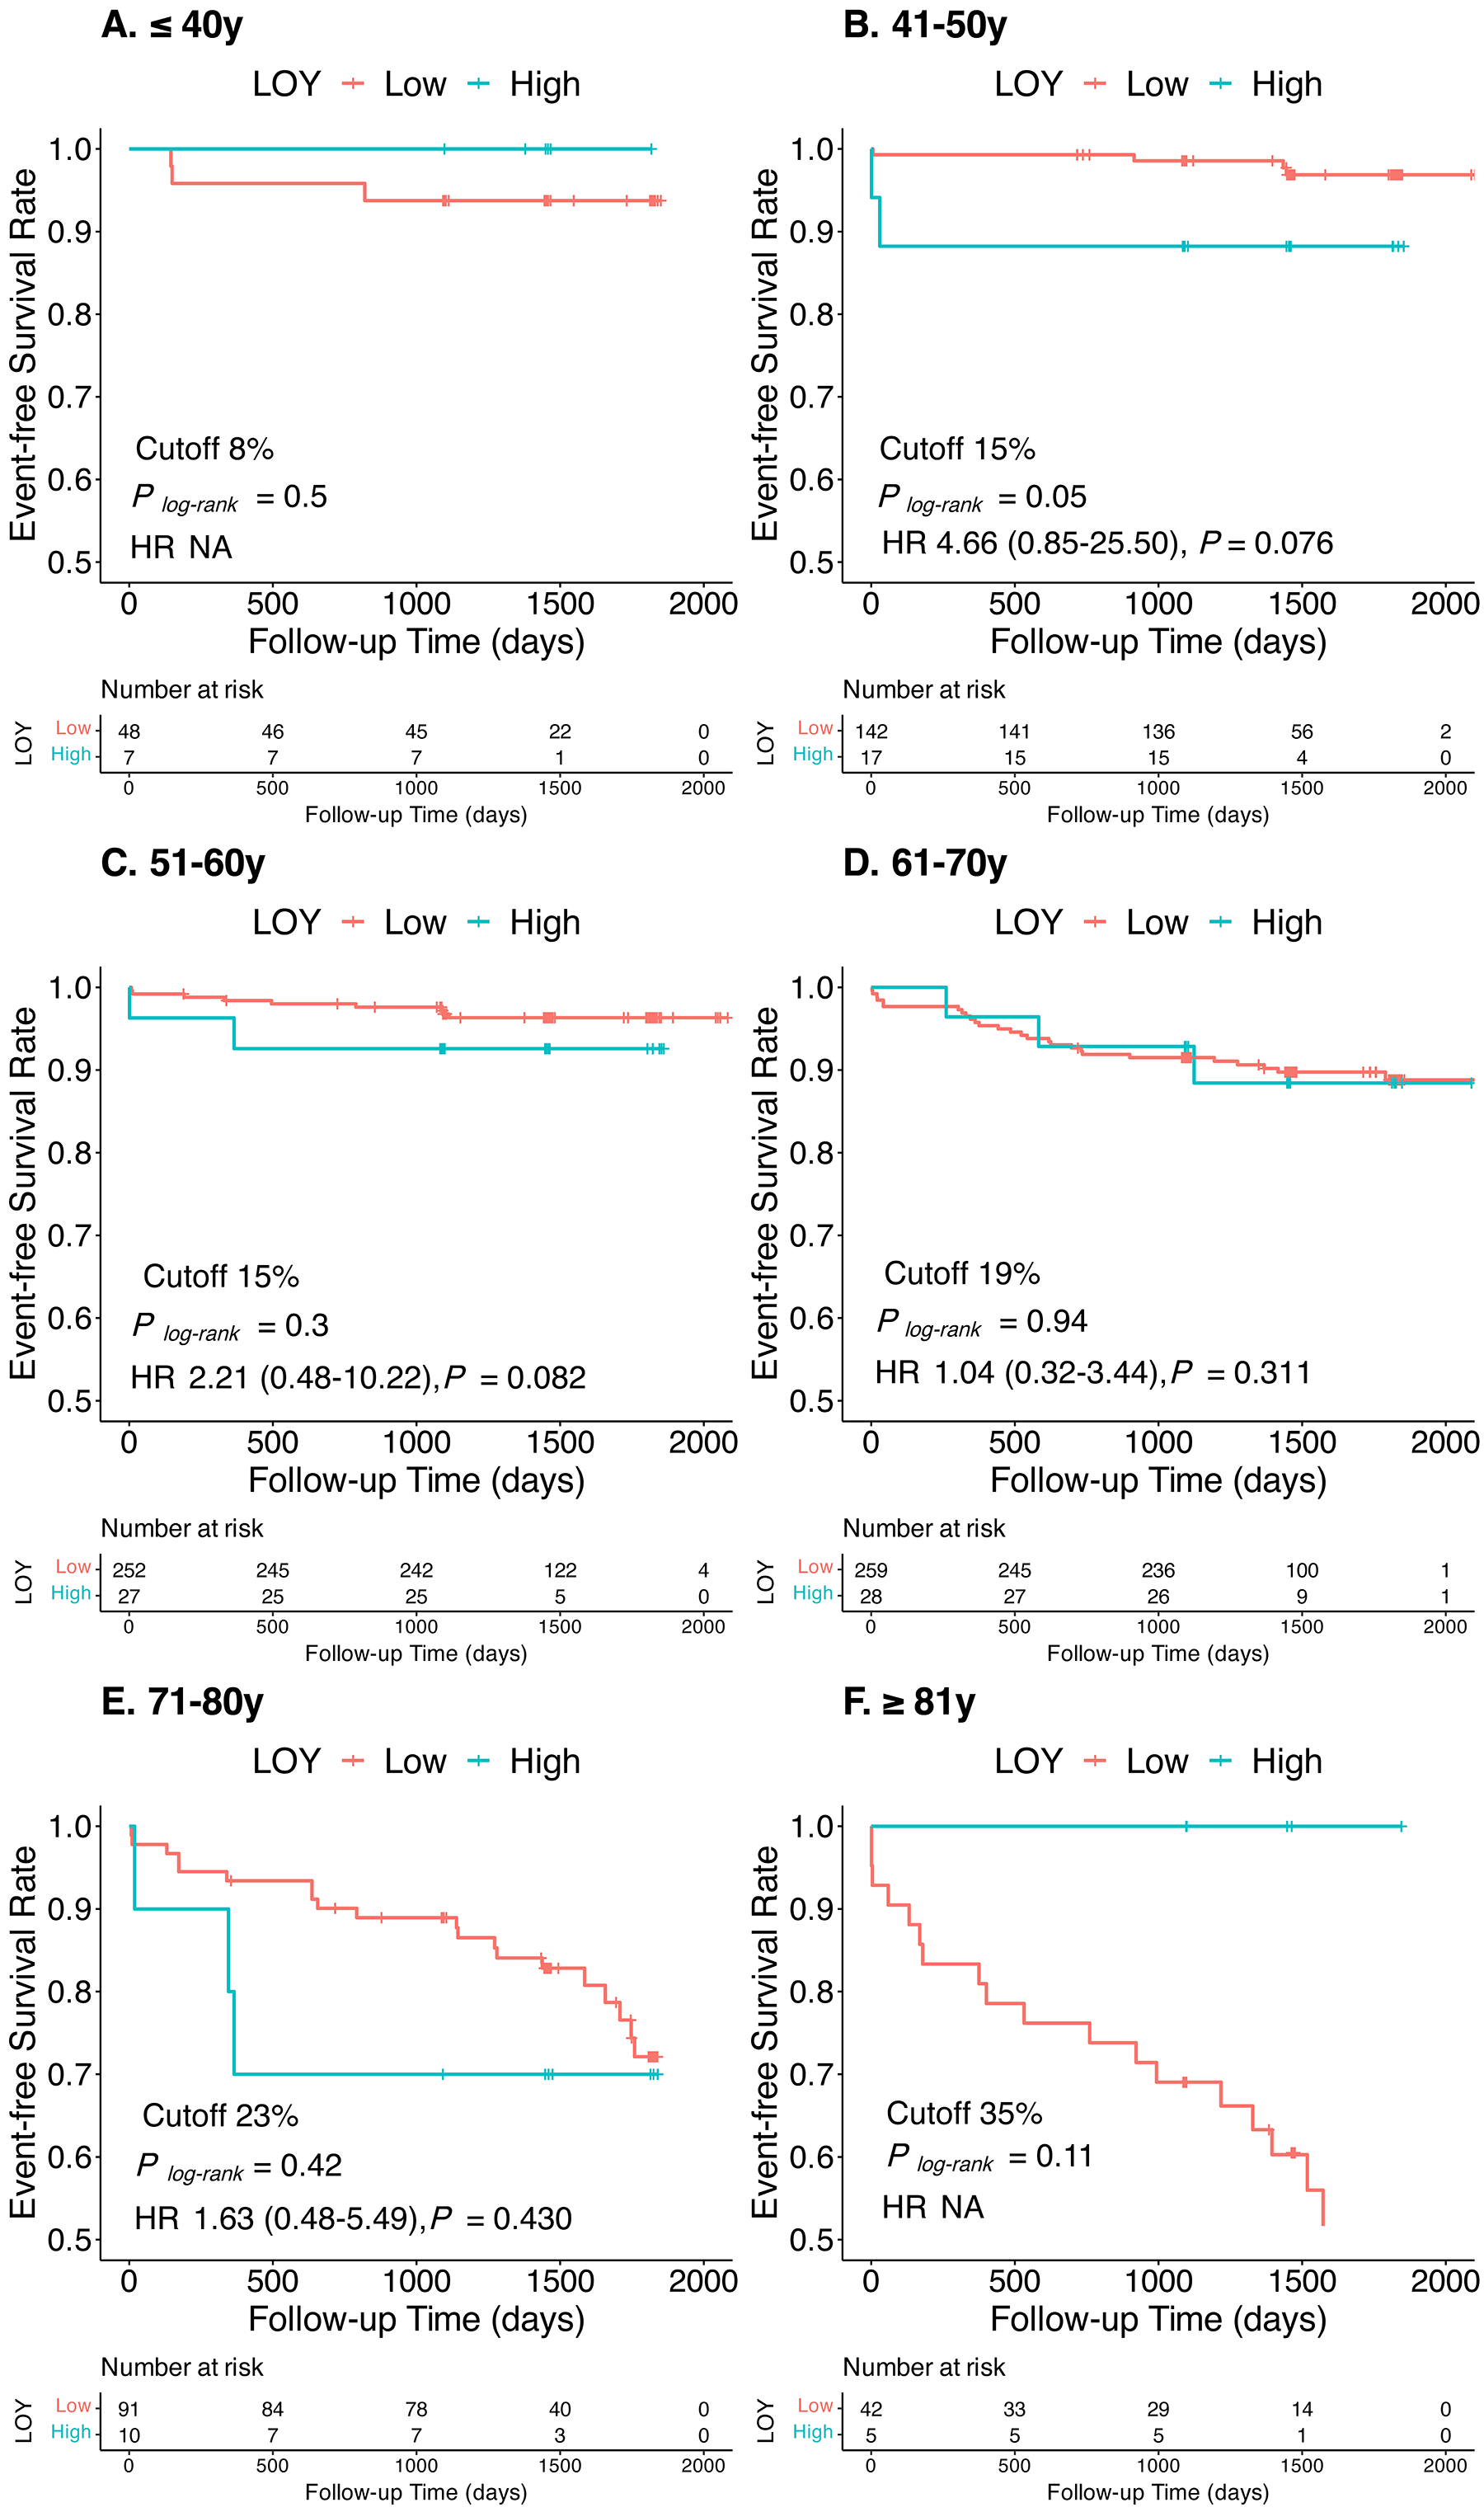


**Figure S6. Kaplan–Meier curves for cumulative survival rate between groups by dichotomized loss of Y chromosome ratio in age subgroups.** Cutoff value used the value of the top 10% percentile of each group. HR, hazard ratio; LOY, loss of chromosome.

**Figure S7.**

**
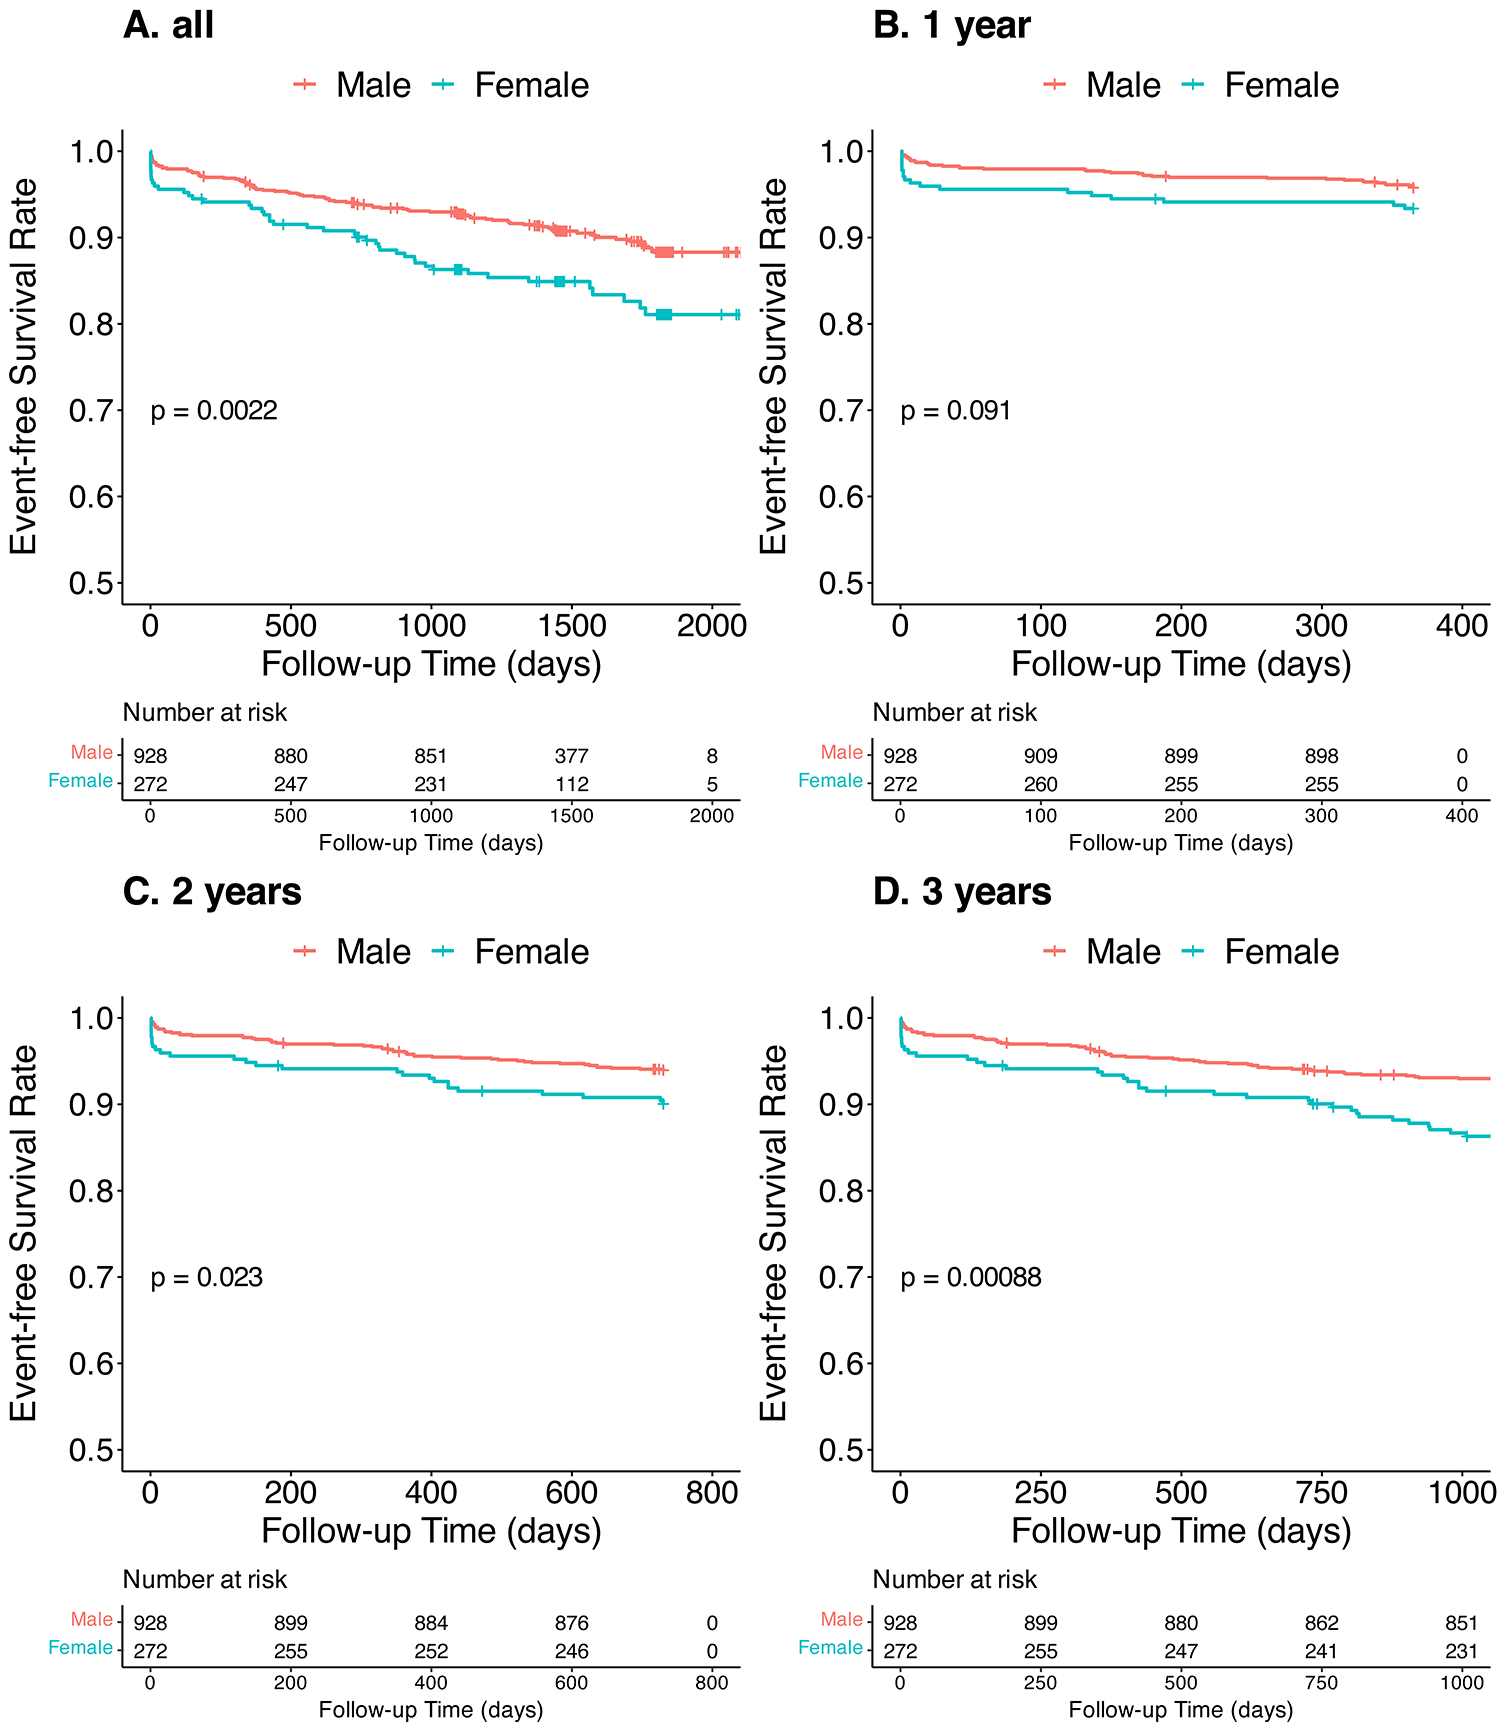
**

**Figure S7. Kaplan–Meier curves for cumulative survival rate between males and females at 1 year, 2 years, 3 years, and over the entire follow-up period.**

**Table S1**

Table S1 The association of loss of Y chromosome ratio and baseline variables.

| **Variable** | | ***R**** | ***P*-value** |
| --- | --- | --- | --- |
| Age (years) | 0.23 | | < 0.001 |
| BMI (kg/m2) | -0.04 | | 0.192 |
| LVEF (%) | -0.07 | | 0.032 |
| eGFR(ml/min/1.732m2*) | -0.05 | | 0.148 |
| Base cTnI (ng/mL) | -0.02 | | 0.451 |
| Peak cTnI (ng/mL) | 0.01 | | 0.804 |
| Base NT-proBNP (pg/mL) | 0.08 | | 0.022 |
| Peak NT-proBNP (pg/mL) | 0.08 | | 0.022 |
| TC (mmol/L) | -0.10 | | 0.003 |
| Triglyceride (mmol/L) | -0.03 | | 0.445 |
| LDL-C (mmol/L) | -0.09 | | 0.009 |
| HDL-C (mmol/L) | -0.01 | | 0.664 |
| Lipoprotein(a) (mg/dL) | -0.04 | | 0.204 |
| Glucose (mmol/L) | -0.02 | | 0.575 |
| HbA1c (%) | -0.03 | | 0.332 |
| hsCRP (mg/L) | -0.02 | | 0.492 |
| D-dimer (mg/L) | 0.00 | | 0.937 |

BMI, body mass index; cTnI, cardiac troponin I; eGFR, estimated glomerular filtration rate; HbA1c, hemoglobin A1c; HDL-C, high-density lipoprotein cholesterol; hsCRP, high-sensitivity C-reactive protein; LDL-C, low-density lipoprotein cholesterol; LVEF, left ventricular ejection fraction; NT-proBNP, N-terminal pro B-type natriuretic peptide; TC, total cholesterol.

* calculated using Spearman correlation tests

**Table S2**

Table S2 Baseline characteristics according to sex and dichotomized loss of Y chromosome ratio.

|  | **Total (n = 1200)** | **LOY < 18% (n = 836)** | **LOY ≥ 18% (n = 92)** | **Female (n = 272)** | ***P*-value** |
| --- | --- | --- | --- | --- | --- |
| Age (years) | 61.0 (52.0, 69.0) | 57.9 (50.0, 65.0) | 65.0 (56.0, 73.5) | 69.0 (62.0, 77.0) a, b, c | < 0.001 |
| ≥ 75years | 84 (9.1) | 61 (7.3) | 23 (25.0) | 90 (33.1) a, b, c | < 0.001 |
| BMI (kg/m2) | 25.7 (23.3, 27.9) | 26.0 (23.4, 28.0) | 25.4 (23.4, 28.2) | 25.0 (22.8, 27.3) a, c | 0.005 |
| Current Smoker | 833 (69.4) | 709 (84.8) | 75 (81.5) | 49 (18.0) a, b, c | < 0.001 |
| Hypertension | 767 (63.9) | 506 (60.5) | 58 (63.0) | 203 (74.6) a, b, c | < 0.001 |
| Dyslipidemia | 1078 (89.8) | 753 (90.1) | 85 (92.4) | 240 (88.2) | 0.479 |
| Diabetes mellitus | 408 (34.0) | 259 (31.0) | 32 (34.8) | 117 (43.0) a, c | 0.001 |
| Previous Stroke | 176 (14.7) | 107 (12.8) | 16 (17.4) | 53 (19.5) a | 0.019 |
| CKD | 87 (7.2) | 49 (5.9) | 6 (6.5) | 32 (11.8) a, c | 0.005 |
| PAD | 60 (5.0) | 38 (4.5) | 7 (7.6) | 15 (5.5) | 0.349 |
| Previous MI | 191 (15.9) | 131 (15.7) | 25 (27.2) | 35 (12.9) b | 0.005 |
| Previous PCI | 187 (15.6) | 125 (15) | 30 (32.6) | 32 (11.8) b | < 0.001 |
| Killip (II- IV) | 171 (14.2) | 89 (10.6) | 20 (21.7) | 62 (22.8) a, c | < 0.001 |
| LVEF (%) | 55.0 (49.0, 58.0) | 55.0 (50.0, 59.0) | 53.0 (45.0, 58.0) | 55.0 (47.8, 58.0) a | 0.008 |
| LVEF < 40% | 72 (6.0) | 38 (4.5) | 9 (9.8) | 25 (9.2) a | 0.006 |
| Anterior MI | 571 (47.6) | 383 (45.8) | 49 (53.3) | 139 (51.1) | 0.166 |
| MVD | 883 (73.6) | 608 (72.7) | 77 (83.7) | 198 (72.8) | 0.073 |
| eGFR(ml/min/1.732m2*) | 83.7 (68.7, 98.0) | 85.4 (72.8, 99.2) | 82.0 (66.2, 95.3) | 73.7 (58.8, 92.9) a, c | < 0.001 |
| Base cTnI (ng/mL) | 1.2 (0.1, 6.2) | 1.2 (0.1, 5.8) | 0.5 (0.1, 6.5) | 1.7 (0.2, 7.1) a, b, c | 0.039 |
| Peak cTnI (ng/mL) | 16.9 (5.7, 38.4) | 17.9 (5.6, 38.6) | 18.0 (3.8, 34.4) | 15.5 (6.5, 38.6) | 0.914 |
| Base NT-proBNP (pg/mL) | 278.0 (75.0, 998.1) | 208.4 (54.5, 689.5) | 313.0 (86.0, 1567.9) | 645.5 (159.2,2096.7) a, b, c | < 0.001 |
| Peak NT-proBNP (pg/mL) | 1541.3 (583.5, 3237.7) | 1185.2 (503.1, 2698.0) | 1626.8 (530.4, 3483.0) | 2751.4 (1336.6, 6179.2) a, b, c | < 0.001 |
| TC (mmol/L) | 4.3 (3.6, 5.0) | 4.3 (3.6, 5.0) | 4.0 (3.5, 4.9) | 4.5 (3.8, 5.3) a, b, c | 0.001 |
| Triglyceride (mmol/L) | 1.4 (1.0, 2.0) | 1.5 (1.0, 2.1) | 1.4 (1.0, 2.1) | 1.4 (1.0, 2.0) | 0.715 |
| LDL-C (mmol/L) | 2.7 (2.1, 3.3) | 2.7 (2.1, 3.3) | 2.5 (2.0, 3.2) | 2.8 (2.2, 3.4) a, b, c | 0.036 |
| HDL-C (mmol/L) | 1.0 (0.9, 1.2) | 1.0 (0.9, 1.2) | 1.0 (0.8, 1.3) | 1.2 (1.0, 1.4) a, b, c | < 0.001 |
| Lipoprotein(a) (mg/dL) | 170.0 (77.0, 346.0) | 158.0 (74.0, 328.5) | 156.0 (81.1, 279.8) | 198.5 (92.6, 400.5) a, b, c | 0.022 |
| Glucose (mmol/L) | 7.5 (6.0, 9.8) | 7.3 (5.9, 9.5) | 7.0 (5.7, 10.0) | 8.0 (6.5, 10.7) a, b, c | < 0.001 |
| HbA1c (%) | 6.1 (5.7, 7.3) | 6.1 (5.6, 7.2) | 6.2 (5.7, 7.0) | 6.4 (5.8, 7.9) a, c | 0.003 |
| hsCRP (mg/L) | 6.1 (2.3, 10.9) | 5.5 (2.1, 10.7) | 4.7 (1.5, 11.1) | 7.1 (2.9, 11.2) a, c | 0.030 |
| **Medication at discharge** |  |  |  |  |  |
| Aspirin | 1129 (95.5) | 793 (95.8) | 86 (95.6) | 250 (94.7) | 0.737 |
| Ticagrelor | 580 (49.1) | 439 (53.0) | 43 (47.8) | 98 (37.1) a, c | < 0.001 |
| Clopidogrel | 600 (50.8) | 386 (46.6) | 47 (52.2) | 167 (63.3) a, c | < 0.001 |
| Statins | 1138 (96.3) | 799 (96.5) | 84 (93.3) | 255 (96.6) | 0.295 |
| ACEI/ARB | 839 (71.0) | 599 (72.3) | 62 (68.9) | 178 (67.4) | 0.278 |
| Βeta Blocker | 1022 (86.5) | 722 (87.2) | 69 (76.7) | 231 (87.5) b | 0.018 |

Continuous variables are presented as medians (25−75th percentiles), and categorical variables are reported as counts (%).

a, compared with patients with LOY < 18%, *P* < 0.05; b, compared with patients with LOY ≥ 18%, *P* < 0.05; c, compared with total male patients, *P* < 0.05.

ACEI/ARB indicates angiotensin-converting enzyme inhibitors/angiotensin receptor blockers; BMI, body mass index; CKD, chronic kidney disease; cTnI, cardiac troponin I; eGFR, estimated glomerular filtration rate; DM, diabetes mellitus; HbA1c, hemoglobin A1c; HDL-C, high-density lipoprotein cholesterol; hsCRP, high-sensitivity C-reactive protein; LDL-C, low-density lipoprotein cholesterol; LVEF, left ventricular ejection fraction; MI, myocardial infarction; MVD, multiple vessels disease; NT-proBNP, N-terminal pro B-type natriuretic peptide; PAD, peripheral artery disease; PCI, percutaneous coronary intervention; TC, total cholesterol.

**Table S3**

Table S3 Association between all-cause mortality and groups based on sex and dichotomized loss of Y chromosome ratio.

| **Time** | **Group** | **Event(n.%)** | **crude.HR(95%CI)** | ***P*-value** | **Model 1 HR (95%CI)** | ***P*-value** | **Model 2 HR (95%CI)** | ***P*-value** |
| --- | --- | --- | --- | --- | --- | --- | --- | --- |
| **All** | LOY＜18% | 78 (9.3) | 1 (Ref) |  | 1 (Ref) |  | 1 (Ref) |  |
|  | LOY ≥ 18% | 15 (16.3) | 1.99 (1.14~3.45) | 0.015 | 1.98 (1.14~3.45) | 0.016 | 1.20 (0.68~2.11) | 0.531 |
|  | Female | 45 (16.5) | 1.89 (1.31~2.72) | 0.001 | 1.71 (1.04~2.81) | 0.035 | 1.06 (0.66~1.70) | 0.818 |
|  | Male | 93 (10.0) | 1 (Ref) |  | 1 (Ref) |  | 1 (Ref) |  |
|  | Female | 45 (16.5) | 1.73 (1.21~2.48) | 0.002 | 1.55 (0.95~2.52) | 0.078 | 1.02 (0.64~1.61) | 0.935 |
| **1 year** | LOY＜18% | 29 (3.5) | 1 (Ref) |  | 1 (Ref) |  | 1 (Ref) |  |
|  | LOY ≥ 18% | 10 (10.9) | 3.23 (1.57~6.62) | 0.001 | 3.28 (1.60~6.74) | 0.001 | 2.21 (1.06~4.61) | 0.035 |
|  | Female | 18 (6.6) | 1.96 (1.09~3.53) | 0.025 | 2.41 (1.12~5.20) | 0.024 | 1.50 (0.71~3.19) | 0.289 |
|  | Male | 39 (4.2) | 1 (Ref) |  | 1 (Ref) |  | 1 (Ref) |  |
|  | Female | 18 (6.6) | 1.61 (0.92~2.82) | 0.094 | 1.96 (0.93~4.13) | 0.079 | 1.23 (0.60~2.54) | 0.568 |
| **2 years** | LOY＜18% | 43 (5.1) | 1 (Ref) |  | 1 (Ref) |  | 1 (Ref) |  |
|  | LOY ≥ 18% | 13 (14.1) | 2.88 (1.55~5.35) | 0.001 | 2.92 (1.57~5.44) | 0.001 | 1.92 (1.02~3.63) | 0.044 |
|  | Female | 27 (9.9) | 1.99 (1.23~3.23) | 0.005 | 1.83 (0.97~3.45) | 0.062 | 1.19 (0.64~2.22) | 0.577 |
|  | Male | 56 (6.0) | 1 (Ref) |  | 1 (Ref) |  | 1 (Ref) |  |
|  | Female | 27 (9.9) | 1.69 (1.07~2.68) | 0.025 | 1.52 (0.82~2.83) | 0.181 | 1.02 (0.56~1.85) | 0.947 |
| **3 years** | LOY＜18% | 53 (6.3) | 1 (Ref) |  | 1 (Ref) |  | 1 (Ref) |  |
|  | LOY ≥ 18% | 14 (15.2) | 2.53 (1.41~4.57) | 0.002 | 2.55 (1.42~4.61) | 0.002 | 1.69 (0.92~3.09) | 0.090 |
|  | Female | 37 (13.6) | 2.24 (1.47~3.40) | < 0.001 | 2.06 (1.18~3.60) | 0.011 | 1.35 (0.78~2.33) | 0.284 |
|  | Male | 67 (7.2) | 1 (Ref) |  | 1 (Ref) |  | 1 (Ref) |  |
|  | Female | 37 (13.6) | 1.95 (1.31~2.92) | 0.001 | 1.76 (1.02~3.04) | 0.042 | 1.20 (0.71~2.02) | 0.504 |

CI: confidence interval; HR, hazard ratio.

Model 1: Adjusted for body mass index, current smoker, hypertension, dyslipidemia, diabetes mellitus, and peripheral artery disease;

Model 2: model 1+ age.
